# Supplementary material for: Web-based interventions for prevention and treatment of perinatal mood disorders: a systematic review
Source: BMC Pregnancy Childbirth. 2016 Feb 29;16:38. doi: 10.1186/s12884-016-0831-1 (PMC4770541; doi:10.1186/s12884-016-0831-1)
Supplement: Additional file 1: — Systematic Search Strategies. Full search strategies of all databases used within the systematic review. (PDF 107 kb) [file 12884_2016_831_MOESM1_ESM.pdf]

## Additional file 1: Database search strategies

| Ovid MEDLINE(R) 1946 to March Week 2 2015 |                                                                                                                                                                                                                                                                                                                 |         |             |
|-------------------------------------------|-----------------------------------------------------------------------------------------------------------------------------------------------------------------------------------------------------------------------------------------------------------------------------------------------------------------|---------|-------------|
| #                                         | Searches                                                                                                                                                                                                                                                                                                        | Results | Search Type |
| 1                                         | Depression/                                                                                                                                                                                                                                                                                                     | 79319   | Advanced    |
| 2                                         | (depressive or depressed).mp. or depression.ti,ab. [mp=title, abstract, original title, name of substance word, subject heading word, keyword heading word, protocol supplementary concept word, rare disease supplementary concept word, unique identifier]                                                    | 299894  | Advanced    |
| 3                                         | Depression, Postpartum/                                                                                                                                                                                                                                                                                         | 3533    | Advanced    |
| 4                                         | 1 or 2 or 3                                                                                                                                                                                                                                                                                                     | 321197  | Advanced    |
| 5                                         | Pregnancy/                                                                                                                                                                                                                                                                                                      | 704364  | Advanced    |
| 6                                         | Perinatal Care/                                                                                                                                                                                                                                                                                                 | 2939    | Advanced    |
| 7                                         | Prenatal Care/                                                                                                                                                                                                                                                                                                  | 20722   | Advanced    |
| 8                                         | Postnatal Care/                                                                                                                                                                                                                                                                                                 | 4008    | Advanced    |
| 9                                         | Pregnancy Complications/                                                                                                                                                                                                                                                                                        | 74677   | Advanced    |
| 10                                        | (ante?natal or peri?natal or pre?partum or post?natal).mp. or post?partum.ti,ab. [mp=title, abstract, original title, name of substance word, subject heading word, keyword heading word, protocol supplementary concept word, rare disease supplementary concept word, unique identifier]                      | 170329  | Advanced    |
| 11                                        | 5 or 6 or 7 or 8 or 9 or 10                                                                                                                                                                                                                                                                                     | 798167  | Advanced    |
| 12                                        | 4 and 11                                                                                                                                                                                                                                                                                                        | 13736   | Advanced    |
| 13                                        | Self Care/                                                                                                                                                                                                                                                                                                      | 24322   | Advanced    |
| 14                                        | Self-Help Groups/                                                                                                                                                                                                                                                                                               | 7907    | Advanced    |
| 15                                        | Behaviour Therapy/ or Cognitive Therapy/                                                                                                                                                                                                                                                                        | 39427   | Advanced    |
| 16                                        | Internet/                                                                                                                                                                                                                                                                                                       | 51499   | Advanced    |
| 17                                        | Psychotherapy/ or Therapy, Computer-Assisted/ or Software/ or Online Systems/                                                                                                                                                                                                                                   | 133824  | Advanced    |
| 18                                        | (mobile applications or software design or user-computer interface or video games or web browser).mp. [mp=title, abstract, original title, name of substance word, subject heading word, keyword heading word, protocol supplementary concept word, rare disease supplementary concept word, unique identifier] | 36037   | Advanced    |
| 19                                        | (self?care or self?help or self?management or intervention* or web*).mp. or E?health.ti,ab.                                                                                                                                                                                                                     | 619523  | Advanced    |

|    |                                                                                                                                                                                                           |          |          |
|----|-----------------------------------------------------------------------------------------------------------------------------------------------------------------------------------------------------------|----------|----------|
|    | [mp=title, abstract, original title, name of substance word, subject heading word, keyword heading word, protocol supplementary concept word, rare disease supplementary concept word, unique identifier] |          |          |
| 20 | Telemedicine/                                                                                                                                                                                             | 11775    | Advanced |
| 21 | Humans/                                                                                                                                                                                                   | 13760465 | Advanced |
| 22 | 16 or 17 or 18 or 19 or 20                                                                                                                                                                                | 790204   | Advanced |
| 23 | 13 or 14 or 15                                                                                                                                                                                            | 69969    | Advanced |
| 24 | 4 and 11 and 21 and 22 and 23                                                                                                                                                                             | 148      | Advanced |

| <b>EMBASE 1980 to 2015 Week 11</b> |                                                                                                                                                                                                                                            |                |                    |
|------------------------------------|--------------------------------------------------------------------------------------------------------------------------------------------------------------------------------------------------------------------------------------------|----------------|--------------------|
| <b>#</b>                           | <b>Searches</b>                                                                                                                                                                                                                            | <b>Results</b> | <b>Search Type</b> |
| 1                                  | depression/                                                                                                                                                                                                                                | 252808         | Advanced           |
| 2                                  | depressive.mp. or depressed.ti,ab. [mp=title, abstract, subject headings, heading word, drug trade name, original title, device manufacturer, drug manufacturer, device trade name, keyword]                                               | 177234         | Advanced           |
| 3                                  | mental health/                                                                                                                                                                                                                             | 78875          | Advanced           |
| 4                                  | wellbeing/                                                                                                                                                                                                                                 | 36190          | Advanced           |
| 5                                  | puerperal depression/                                                                                                                                                                                                                      | 6400           | Advanced           |
| 6                                  | 1 or 2 or 3 or 4 or 5                                                                                                                                                                                                                      | 445846         | Advanced           |
| 7                                  | pregnancy/                                                                                                                                                                                                                                 | 526890         | Advanced           |
| 8                                  | perinatal care/                                                                                                                                                                                                                            | 10491          | Advanced           |
| 9                                  | prenatal care/                                                                                                                                                                                                                             | 27485          | Advanced           |
| 10                                 | postnatal care/                                                                                                                                                                                                                            | 5021           | Advanced           |
| 11                                 | puerperium/                                                                                                                                                                                                                                | 27267          | Advanced           |
| 12                                 | pregnancy complication/                                                                                                                                                                                                                    | 69165          | Advanced           |
| 13                                 | (ante?natal or peri?natal or pre?partum or post?natal).mp. or post?partum.ti,ab. [mp=title, abstract, subject headings, heading word, drug trade name, original title, device manufacturer, drug manufacturer, device trade name, keyword] | 231155         | Advanced           |
| 14                                 | 7 or 8 or 9 or 10 or 11 or 12 or 13                                                                                                                                                                                                        | 716340         | Advanced           |
| 15                                 | self care/                                                                                                                                                                                                                                 | 33579          | Advanced           |
| 16                                 | self help/                                                                                                                                                                                                                                 | 11563          | Advanced           |
| 17                                 | behaviour therapy/                                                                                                                                                                                                                         | 37114          | Advanced           |
| 18                                 | cognitive therapy/                                                                                                                                                                                                                         | 35758          | Advanced           |

|    |                                                                                                                                                                                                                                                                 |         |          |
|----|-----------------------------------------------------------------------------------------------------------------------------------------------------------------------------------------------------------------------------------------------------------------|---------|----------|
| 19 | psychotherapy/ or psychodynamic psychotherapy/                                                                                                                                                                                                                  | 76653   | Advanced |
| 20 | cognitive behavioural therapy.mp. or cognitive therapy/                                                                                                                                                                                                         | 36173   | Advanced |
| 21 | Internet/                                                                                                                                                                                                                                                       | 77807   | Advanced |
| 22 | online system/ or online therapy.mp.                                                                                                                                                                                                                            | 18204   | Advanced |
| 23 | computer aided design/ or computer/ or computer assisted diagnosis/ or computer program/                                                                                                                                                                        | 257326  | Advanced |
| 24 | (mobile applications or software design or user-computer interface or video games or web browser).mp. [mp=title, abstract, subject headings, heading word, drug trade name, original title, device manufacturer, drug manufacturer, device trade name, keyword] | 6217    | Advanced |
| 25 | telemedicine/                                                                                                                                                                                                                                                   | 12141   | Advanced |
| 26 | (intervention* or web*).mp. or E?health.ti,ab. [mp=title, abstract, subject headings, heading word, drug trade name, original title, device manufacturer, drug manufacturer, device trade name, keyword]                                                        | 906209  | Advanced |
| 27 | 15 or 16 or 17 or 18 or 19 or 20                                                                                                                                                                                                                                | 170103  | Advanced |
| 28 | 21 or 22 or 23 or 24 or 25 or 26                                                                                                                                                                                                                                | 1203502 | Advanced |
| 29 | 6 and 14 and 27 and 28                                                                                                                                                                                                                                          | 367     | Advanced |
| 30 | limit 29 to human                                                                                                                                                                                                                                               | 363     | Advanced |

#### CINAHL SEARCH – 20/3/15

|    |                                                            |
|----|------------------------------------------------------------|
| 1  | (MH "Anxiety") OR (MH "Depression")                        |
| 2  | depressed or depressive. TI, AB                            |
| 3  | (MH "Mental Health")                                       |
| 4  | (MH "Psychological Well-Being")                            |
| 5  | (MH "Mindfulness")                                         |
| 6  | (MH "Depression, Postpartum")                              |
| 7  | 1 OR 2 OR 3 OR 4 OR 5 OR 6                                 |
| 8  | (MH "Pregnancy")                                           |
| 9  | (MH "Prenatal Care") OR (MH "Prenatal Care (Iowa NIC)")    |
| 10 | (MH "Perinatal Care")                                      |
| 11 | (MH "Postnatal Care") OR (MH "Postpartum Care (Saba CCC)") |
| 12 | (MH "Pregnancy Complications")                             |

|    |                                                                                                               |
|----|---------------------------------------------------------------------------------------------------------------|
| 13 | (MH "Pregnancy Complications, Psychiatric")                                                                   |
| 14 | 8 OR 9 OR 10 OR 11 OR 12 OR 13                                                                                |
| 15 | (MH "Self Care")                                                                                              |
| 16 | (MH "Cognitive Therapy (Iowa NIC) (Non-Cinahl)") OR (MH "Cognitive Therapy")                                  |
| 17 | (MH "Behaviour Therapy") OR (MH "Behaviour Therapy (Iowa NIC) (Non-Cinahl)") OR (MH "Behaviour Modification") |
| 18 | (MH "Psychotherapy") OR (MH "Psychotherapy, Brief")                                                           |
| 19 | 15 OR 16 OR 17 OR 18                                                                                          |
| 20 | (MH "Therapy, Computer Assisted")                                                                             |
| 21 | (MH "Internet") OR (MH "Telepsychiatry")                                                                      |
| 22 | (MH "Telemedicine") OR (MH "Telehealth")                                                                      |
| 23 | (MH "World Wide Web") OR (MH "Website Development") OR (MH "World Wide Web Applications")                     |
| 24 | (MH "Online Services") OR (MH "Online Systems")                                                               |
| 25 | (MH "User-Computer Interface")                                                                                |
| 26 | "e-health"                                                                                                    |
| 27 | "Web*"                                                                                                        |
| 28 | 20 OR 21 OR 22 OR 23 OR 24 OR 25 OR 26 OR 27                                                                  |
| 29 | 7 AND 14 AND 19 AND 28                                                                                        |

#### PsycINFO 1987 to March Week 3 2015

| # | Searches                                                                                                                                 | Results | Search Type |
|---|------------------------------------------------------------------------------------------------------------------------------------------|---------|-------------|
| 1 | "depression (emotion)"/                                                                                                                  | 10740   | Advanced    |
| 2 | depressive.mp. or depressed.ti,ab. [mp=title, abstract, heading word, table of contents, key concepts, original title, tests & measures] | 89863   | Advanced    |
| 3 | mental health/                                                                                                                           | 38055   | Advanced    |
| 4 | postpartum depression/                                                                                                                   | 3110    | Advanced    |
| 5 | 1 or 2 or 3 or 4                                                                                                                         | 132579  | Advanced    |
| 6 | pregnancy/                                                                                                                               | 14122   | Advanced    |
| 7 | prenatal care/                                                                                                                           | 1363    | Advanced    |
| 8 | perinatal period/                                                                                                                        | 1813    | Advanced    |
| 9 | postnatal period/                                                                                                                        | 3254    | Advanced    |

|    |                                                                                                                                                                                                                                           |       |          |
|----|-------------------------------------------------------------------------------------------------------------------------------------------------------------------------------------------------------------------------------------------|-------|----------|
| 10 | (ante?natal or peri?natal or pre?partum or post?natal).mp. or post?partum.ti,ab. [mp=title, abstract, heading word, table of contents, key concepts, original title, tests & measures]                                                    | 26226 | Advanced |
| 11 | 7 or 8 or 9 or 10                                                                                                                                                                                                                         | 27111 | Advanced |
| 12 | self care skills/                                                                                                                                                                                                                         | 2952  | Advanced |
| 13 | self management/                                                                                                                                                                                                                          | 4437  | Advanced |
| 14 | self help techniques/                                                                                                                                                                                                                     | 3049  | Advanced |
| 15 | cognitive behaviour therapy/                                                                                                                                                                                                              | 12498 | Advanced |
| 16 | cognitive therapy/                                                                                                                                                                                                                        | 10805 | Advanced |
| 17 | behaviour therapy/                                                                                                                                                                                                                        | 7413  | Advanced |
| 18 | psychotherapy/                                                                                                                                                                                                                            | 34649 | Advanced |
| 19 | relaxation therapy/                                                                                                                                                                                                                       | 1466  | Advanced |
| 20 | 12 or 13 or 14 or 15 or 16 or 17 or 18 or 19                                                                                                                                                                                              | 72618 | Advanced |
| 21 | internet/                                                                                                                                                                                                                                 | 22999 | Advanced |
| 22 | websites/                                                                                                                                                                                                                                 | 3378  | Advanced |
| 23 | computer assisted therapy/                                                                                                                                                                                                                | 573   | Advanced |
| 24 | online therapy/                                                                                                                                                                                                                           | 1626  | Advanced |
| 25 | (software or online systems or mobile applications or software design or user-computer interface or video games or web browser).mp. [mp=title, abstract, heading word, table of contents, key concepts, original title, tests & measures] | 21464 | Advanced |
| 26 | telemedicine/                                                                                                                                                                                                                             | 2764  | Advanced |
| 27 | web*.mp.                                                                                                                                                                                                                                  | 33157 | Advanced |
| 28 | 21 or 22 or 23 or 24 or 25 or 26 or 27                                                                                                                                                                                                    | 69690 | Advanced |
| 29 | 5 and 11 and 20 and 28                                                                                                                                                                                                                    | 5     | Advanced |
| 30 | limit 29 to human                                                                                                                                                                                                                         | 5     | Advanced |

**Additional file 1: Clinicaltrials.gov was searched on the 26<sup>th</sup> of March 2015 by combination of a number of key terms. All searches were conducted using the advanced searcher.**

Search 1: “online” AND “therapy” AND “depression” AND “pregnancy”  
(3 results)

Search 2: “web-based” AND “intervention” AND “depression” AND “pregnancy”  
(4 results)

Search 3: “web-based” AND “therapy” AND “depression” AND “pregnancy”  
(4 results)

Search 4: “online” AND “therapy” AND “mental-health” AND “perinatal”  
(1 result)

Search 5: “online” AND “therapy” AND “depression” AND “post-partum”  
(3 results)

Search 6: “online” AND “CBT” AND “depression” AND “pregnancy”  
(2 results)

Search 7: “computerized cognitive behavioural therapy” AND “pregnancy”  
(0 results)

Search 8: “online” AND “cognitive therapy” AND “depression” AND “pregnancy”  
(2 results)

Search 9: “internet” AND “therapy” AND “depression” AND “pregnancy”  
(9 results)

Search 10: “Internet: AND “intervention” AND “depression” AND “pregnancy”  
(13 results)

Search 11: “Internet: AND “intervention” AND “depression” AND “post-partum”  
(11 results)

Search 12: “Internet: AND “intervention” AND “mental-health” AND “post-partum”  
(6 results)

Search 13: “Computer-assisted” AND “depression” AND “pregnancy”  
(1 result)

Search 14: “Computer-assisted” AND “depression”  
(16 results)
